# Supplementary material for: Developing and Field Testing a Community Based Youth Initiative to Increase Tuberculosis Awareness in Remote Arctic Inuit Communities
Source: PLOS journal article supplement (doi:10.1371/journal.pone.0159241), 2016-07-14

# THE **5** THINGS YOU NEED TO KNOW ABOUT TB

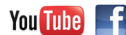

- 1 TB is treated here in Nunavut and is curable.
- 2 People who are sick with active TB disease can have chronic cough, weight loss, night sweats or fever.
- 3 You may be able to infect other people if you have active TB disease in your lungs because TB spreads through the air.
- 4 If you are close with someone who has active TB disease, you may become infected with TB germs and develop sleeping TB infection.
- 5 People with sleeping TB infection are not contagious and can be treated with medication in Nunavut to prevent getting sick with active disease.

CAŁ > ƎƆ ƆƆ ƆƆ  
**TAIMA**

[www.tunngavik.com/taimatb](http://www.tunngavik.com/taimatb)  
Taima TB Team: 867-975-4813

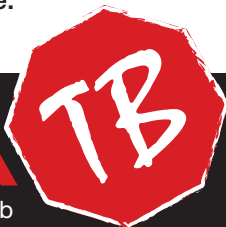

- [illegible]

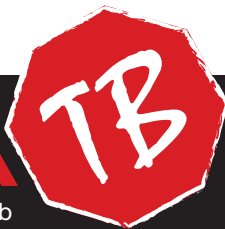

Supplement: S1 (10.1371/journal.pone.0159241.s001) [file journal.pone.0159241.s001]
